# Supplementary material
Source: PubMed Central journal article supplement (PMC2814015)
Supplement: ced0028-0266-s01.pdf [file ced0028-0266-s01.pdf]

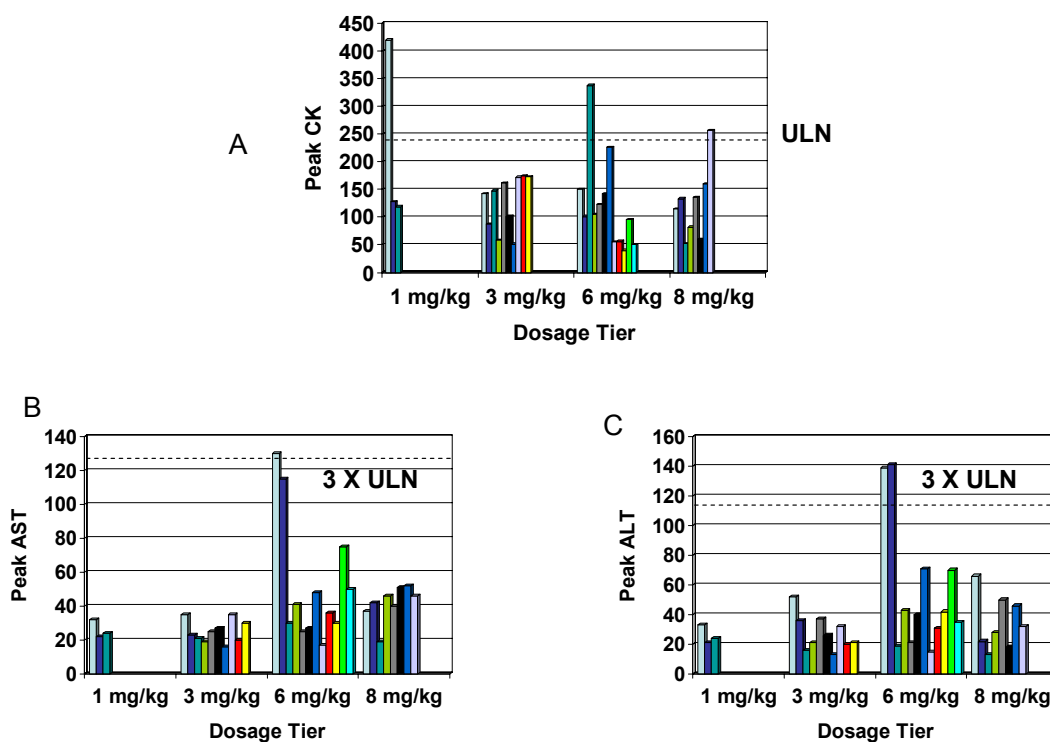

**Figure 1 (on-line only).**

**Peak liver function test and muscle abnormalities during the trial**

The figure shows the peak laboratory test result for CK (A), AST (B), and ALT (C) during repeated testing for each individual participant during the course of the trial. The horizontal line represents the level of three times the upper limit of normal for charts of aspartate aminotransferase (AST) and alanine aminotransferase (ALT), which represents the level for declaring a primary safety outcome; and the upper limit of normal for the chart of CK, though the level for declaring a primary safety outcome based on CK required a level of at least 5 times upper limit of normal. Two patients exceeded the line for either AST or ALT, but no patients exceeded 5 times upper limit of normal for CK.
